# Supplementary material for: The energetic cost of mounting an immune response for Pallas’s long-tongued bat (Glossophaga soricina)
Source: PeerJ. 2018 Jun 5;6:e4627. doi: 10.7717/peerj.4627 (PMC5993019; doi:10.7717/peerj.4627)
Supplement: Data S1 — Resting metabolic rate and body mass in bats injected with LPS and with PBS. [file peerj-06-4627-s001.xlsx]

## Sheet: Body mass
BODY MASS
ID	sex	Treatment	Body mass initial (g)	Body mass final (g)
1	M	LPS	13.2	11.6
2	M	LPS	9.49	8.3
4	F	LPS	11.12	9.5
10	M	LPS	8.6	8
11	M	LPS	10.03	9
8	F	LPS	8.8	7.8
16	M	LPS	9.1	8.1
3	F	PBS	11.6	11.3
5	M	PBS	11.17	10.87
13	M	PBS	8.8	7.9
14	M	PBS	9.95	9.15
18	F	PBS	12.8	12
6	M	PBS	9.33	8.83

## Sheet: RMR
RESTING METABOLIC RATE (RMR)
RMR - pre injection (kJ/hr)	ID	Group		Time after injection (min)	ID	Group	RMR (kJ/hr)
				60	1	LPS	0.50223
0.334276	1	LPS		120	1	LPS	0.451827
0.170539	2	LPS		180	1	LPS	0.443361
0.468019	3	LPS		240	1	LPS	0.358958
0.113741	4	LPS		300	1	LPS	0.359503
0.360927	5	LPS		360	1	LPS	0.359454
0.42881	6	LPS		420	1	LPS	0.342187
0.32028	7	LPS		480	1	LPS	0.35443
0.464922	8	PBS		60	2	LPS	0.378989
0.252344	9	PBS		120	2	LPS	0.334894
0.257302	10	PBS		180	2	LPS	0.350208
0.16103	11	PBS		240	2	LPS	0.308666
0.272688	12	PBS		300	2	LPS	0.296887
0.320316	13	PBS		360	2	LPS	0.264453
				420	2	LPS	0.281103
				480	2	LPS	0.262108
				60	3	LPS	0.92205
				120	3	LPS	0.878907
				180	3	LPS	0.837334
				240	3	LPS	0.632169
				300	3	LPS	0.61098
				360	3	LPS	0.611777
				420	3	LPS	0.612028
				480	3	LPS	0.602519
				60	4	LPS	0.160028
				120	4	LPS	0.14212
				180	4	LPS	0.133954
				240	4	LPS	0.126603
				300	4	LPS	0.112201
				360	4	LPS	0.147647
				420	4	LPS	0.139233
				480	4	LPS	0.129862
				60	5	LPS	0.560956
				120	5	LPS	0.528421
				180	5	LPS	0.517986
				240	5	LPS	0.376654
				300	5	LPS	0.368026
				360	5	LPS	0.336112
				420	5	LPS	0.328533
				480	5	LPS	0.336659
				60	6	LPS	0.541621
				120	6	LPS	0.501669
				180	6	LPS	0.465676
				240	6	LPS	0.438962
				300	6	LPS	0.418939
				360	6	LPS	0.35854
				420	6	LPS	0.360098
				480	6	LPS	0.349008
				60	7	LPS	0.481686
				120	7	LPS	0.449923
				180	7	LPS	0.403212
				240	7	LPS	0.362344
				300	7	LPS	0.362008
				360	7	LPS	0.328583
				420	7	LPS	0.276765
				480	7	LPS	0.27542
				60	8	PBS	0.586116
				120	8	PBS	0.52692
				180	8	PBS	0.523319
				240	8	PBS	0.540888
				300	8	PBS	0.49359
				360	8	PBS	0.477987
				420	8	PBS	0.460517
				480	8	PBS	0.467234
				60	9	PBS	0.239993
				120	9	PBS	0.209592
				180	9	PBS	0.213422
				240	9	PBS	0.219342
				300	9	PBS	0.194828
				360	9	PBS	0.262221
				420	9	PBS	0.264936
				480	9	PBS	0.289348
				60	10	PBS	0.144962
				120	10	PBS	0.113864
				180	10	PBS	0.131797
				240	10	PBS	0.127673
				300	10	PBS	0.150034
				360	10	PBS	0.190526
				420	10	PBS	0.182808
				480	10	PBS	0.190008
				60	11	PBS	0.276543
				120	11	PBS	0.23651
				180	11	PBS	0.229959
				240	11	PBS	0.250432
				300	11	PBS	0.291694
				360	11	PBS	0.303775
				420	11	PBS	0.248478
				480	11	PBS	0.24
				60	12	PBS	0.33566
				120	12	PBS	0.271225
				180	12	PBS	0.236585
				240	12	PBS	0.2234
				300	12	PBS	0.219411
				360	12	PBS	0.219538
				420	12	PBS	0.184782
				480	12	PBS	0.18
				60	13	PBS	0.369532
				120	13	PBS	0.254344
				180	13	PBS	0.250032
				240	13	PBS	0.229653
				300	13	PBS	0.301773
				360	13	PBS	0.329983
				420	13	PBS	0.31842
				480	13	PBS	0.309833
